# Supplementary material
Source: publisher figshare collection journal article supplement (https://acs.figshare.com/ndownloader/files/12559394)
Supplement: Supplementary file 1 [file 12559394]

|    |                                                                                                                                                                              |
|----|------------------------------------------------------------------------------------------------------------------------------------------------------------------------------|
| 1  | <b>Supporting Information for</b>                                                                                                                                            |
| 2  | Measured and modeled residue dynamics of famoxadone and oxathiapiprolin in tomato fields                                                                                     |
| 3  |                                                                                                                                                                              |
| 4  | Xiaoxiao Feng, <sup>†</sup> Kai Wang, <sup>‡</sup> Lixiang Pan, <sup>†</sup> Tianheng Xu, <sup>†</sup> Hongyan Zhang <sup>*†</sup> and Peter Fantke <sup>*<sup>l</sup></sup> |
| 5  | <sup>†</sup> College of Science, China Agricultural University, Beijing 100193, P R China                                                                                    |
| 6  | <sup>‡</sup> Institute of Inorganic and Analytical Chemistry, Johannes Gutenberg University of Mainz,                                                                        |
| 7  | Duesbergweg 10-14, 55128 Mainz, Germany                                                                                                                                      |
| 8  | <sup>l</sup> Quantitative Sustainability Assessment Division, Department of Management Engineering, Technical                                                                |
| 9  | University of Denmark, Bygningstorvet 116, 2800 Kgs. Lyngby, Denmark                                                                                                         |
| 10 | *Corresponding Authors:                                                                                                                                                      |
| 11 | *Tel: (+86) 010-62733219. E-mail: hongyan@cau.edu.cn                                                                                                                         |
| 12 | *Tel: (+45) 452 544 52. E-mail: pefan@dtu.dk                                                                                                                                 |
| 13 |                                                                                                                                                                              |
| 14 |                                                                                                                                                                              |
| 15 |                                                                                                                                                                              |
| 16 |                                                                                                                                                                              |
| 17 |                                                                                                                                                                              |
| 18 |                                                                                                                                                                              |
| 19 |                                                                                                                                                                              |
| 20 | Number of pages (including this page): 13                                                                                                                                    |
| 21 | Number of texts: 5                                                                                                                                                           |
| 22 | Number of tables: 7                                                                                                                                                          |
| 23 | Number of Figures: 1                                                                                                                                                         |
| 24 |                                                                                                                                                                              |
| 25 | Contents lists                                                                                                                                                               |

26    **Text S1.** Selected Chemicals and Reagents

27    **Text S2.** Sample Pretreatment.

28    **Text S3.** HPLC-MS/MS Conditions

29    **Text S4.** Experimental Method Validation

30    **Text S5.** Measured Residues of Famoxadone and Oxathiapiprolin in Soil

31    **Table S1.** Weather and soil condition during the period of tomato planting in the year of 2015 and 2016

32    **Table S2.** Physicochemical properties (MW, molecular weight; K<sub>ow</sub>, octanol-water partition coefficient;

33    K<sub>aw</sub>, air-water partition coefficient; t<sub>1/2,tomatoes</sub>, degradation half-life in tomatoes; t<sub>1/2,soil</sub>, degradation

34    half-life in soil), substance mass applied in model and experiment, treat plant component, application

35    rate and formulation.

36    **Table S3.** Different models to fit residual pesticide concentration curves and estimate corresponding

37    determination coefficient (R<sup>2</sup>) for famoxadone and oxathiapiprolin in tomatoes.

38    **Table S4.** HPLC-MS/MS parameters of famoxadone, oxathiapiprolin, IN-E8S72 and IN-WR791

39    **Table S5.** The calibration curves, coefficient of determination (R<sup>2</sup>) and LOD/LOQs of famoxadone,

40    oxathiapiprolin, IN-E8S72 and IN-WR791 in tomatoes and soil

41    **Table S6.** Recoveries (n=5) and RSD of famoxadone, oxathiapiprolin, IN-E8S72 and IN-WR791 in

42    tomatoes and soil

43    **Table S7.** Different models to fit residual pesticide concentration curves and estimate corresponding

44    determination coefficient (R<sup>2</sup>) for famoxadone and oxathiapiprolin in soil

45    **Figure S1.** Different dissipation kinetic models for famoxadone and oxathiapiprolin during the

46    years of 2015 and 2016 in soil samples in Beijing, respectively (The most suitable model was

47    expressed with solid line and others dotted lines)

48

49 **Text S1. Selected Chemicals and Reagents**

50 Standards of oxathiapiprolin (purity was 98.9%), IN-E8S72 (purity was 99.6%), IN-WR791  
51 (purity was 99.8%), and famoxadone (purity was 96%) were kindly supplied by Dupont company  
52 (USA). The formulation suspoemulsion (SL), containing 330 g/L famoxadone–oxathiapiprolin, was  
53 also provided by Dupont company (USA). The content of famoxadone was 300 g/L and that of  
54 oxathiapiprolin was 30 g/L. HPLC-grade acetonitrile and analytical-grade formic acid (98%) were  
55 purchased from Fisher Chemicals (USA) and Sinopharm Chemical Reagent Co. Ltd. (PRC),  
56 respectively, while Agela Cleanert C<sub>18</sub> (Ø 40–60 µm) was purchased from Agela Technologies (Agela,  
57 Tianjin, PRC). Sodium chloride (NaCl) and anhydrous magnesium sulfate (MgSO<sub>4</sub>) were purchased  
58 from Beijing Chemical Reagents Company (Beijing, China) and were baked at 110°C for 8 h.

59 **Text S2. Sample Pretreatment.**

60 A sample of 10 g was weighed into a 50 mL plastic centrifuge tube. For tomato samples, 5 mL  
61 formic acid water (pH = 3), 10 mL acetonitrile, and 3 g NaCl were then added into the tubes. For soil  
62 samples, 5 mL water, 10 mL formic acid acetonitrile (2%, v/v), and 3 g NaCl were added. Thereafter,  
63 the samples were vigorously extracted with a vortex mixer for 2 min and centrifuged for 5 min at 3800  
64 rpm.

65 A supernatant (1 mL) was transferred into a 2 mL centrifuge tube containing 100 mg anhydrous  
66 MgSO<sub>4</sub> and 50 mg C<sub>18</sub>, then mixed for 30 s and centrifuged for 1 min at 10000 rpm. The upper layer  
67 (acetonitrile phase) was filtered through a 0.22 µm organic filter membrane and transferred into an auto  
68 sampler vial for analysis.

69 **Text S3. HPLC-MS/MS Conditions**

70 All experiments were performed using Agilent Technologies 1200 HPLC series coupled to a

71 triple-quadrupole mass spectrometer (Agilent 6410B Triple Quad) with electrospray ionization (ESI)  
72 source. An Athena C18-WP, 100Å column (50 mm × 2.1 mm id, 3.5 µm) was used for separation.  
73 Famoxadone and oxathiapirolin were separated with the mobile phase of methanol and 0.1% formic  
74 acid water (v/v = 80/20) and the ions were monitored at positive mode with multiple reaction  
75 monitoring (MRM). For the two oxathiapirolin metabolites, IN-E8S72 and IN-WR791, the mobile  
76 phase was acetonitrile and water (v/v = 80/20) and the ESI in negative mode was selected. The flow  
77 rate for both processes was 0.3 mL/min and the injection volume was 5 µL, while the column  
78 temperature was 30°C and the total run time was 2.5 min.

79 The dry gas (N<sub>2</sub>) temperature was 350°C, with the gas flow rate of 8.0 L/min. The nebulizer  
80 pressure was 35 psi and the electrospray voltages for both positive and negative modes were 4000 V.  
81 Precursor and corresponding product ions for the MRM detection for each target compound are  
82 presented in Table S4.

#### 83 **Text S4. Experimental Method Validation**

84 Linearity experiments of famoxadone, oxathiapirolin, IN-E8S72, and IN-WR791 were  
85 performed in the range of 0.005-2 mg/L. Satisfactory linearity was achieved with determination  
86 coefficient (R<sup>2</sup>) value between 0.9984 and 1.00. The limit of detection (LOD) was the concentration  
87 with a signal-to-noise (S/N) ratio of 3, and the limit of quantification (LOQ) was the lowest spiking  
88 level. LODs of four compounds ranged from  $1.5 \times 10^{-5}$  mg/kg to  $3.8 \times 10^{-5}$  mg/kg, while LOQs were  
89 0.01 mg/kg for famoxadone and 0.02 mg/kg for oxathiapirolin, IN-E8S72, and IN-WR791, which are  
90 presented in Table S5.

91 To evaluate the accuracy and precision of this method, three different concentration levels were  
92 spiked into the blank samples with five duplicates. As shown in Table S6, the mean recovery of

93 famoxadone, oxathiapiprolin, IN-E8S72, and IN-WR791 were in the range of 86.0–105.7%, 86.7–  
94 108.4%, 79.8–104.3%, and 80.6–103.3%, with the relative standard deviation (RSD) ranging from 1.4%  
95 to 4.7%, 1.4% to 4.4%, 1.9% to 5.5%, and 2.9% to 3.6%, respectively. The results were satisfactory  
96 according to the residue analysis quality control guide (General Administration of Quarantine of the  
97 People's Republic of China, 2002).

#### 98 **Text S5. Measured Residues of Famoxadone and Oxathiapiprolin in Soil**

99 A lot of factors influence the degradation of pesticide in soil, e.g. the pH, water content, content of  
100 organic matter, which involves complex chemical and microbial action. In this study, we also used  
101 different models to fit the dissipation kinetics of famoxadone and oxathiapiprolin in soil, showed in Fig  
102 S1. Table S7 showed the corresponding residual concentration curve and determination coefficient ( $R^2$ ),  
103 from which we can see the most suitable model for famoxadone in 2015 and 2016 both was first-order  
104 kinetic. The initial concentrations of famoxadone in soil were 0.1910 and 0.1071 mg/kg with half-lives  
105 8.3 day and 6.0 day in 2015 and 2016, respectively. The most suitable model for oxathiapiprolin was  
106 seconder-order and root function one-and-a-half-order and the initial concentrations were 0.0082 and  
107 0.033 mg/kg with half-lives 11.7 day and 1.2 day in 2015 and 2016, respectively. This part of data is  
108 mainly used as model input, and not discussed here.

109

110 **Table S1.** Weather and soil condition during the period of tomato planting in the year of 2015 and 2016

|                               |                                    | 2015      | 2016     |
|-------------------------------|------------------------------------|-----------|----------|
| The date of applied pesticide |                                    | 6/21/2015 | 6/9/2016 |
| Weather condition             | Precipitation (mm/d)               | 2.7       | 2.0      |
|                               | Average temperature (°C)           | 26        | 25       |
|                               | Saturated vapor pressure (Pa)      | 3361      | 3167.6   |
| Soil condition                | pH                                 | 6.73      |          |
|                               | Water content (%)                  | 16.64%    |          |
|                               | Content of organic matter (%)      | 2.3%      |          |
|                               | Cation exchange capacity (cmol/kg) | 29.7      |          |

111

112

113

114

**Table S2.** Physicochemical properties (MW, molecular weight; Kow, octanol-water partition coefficient; Kaw, air-water partition coefficient;  $t_{1/2, \text{tomatoes}}$ , degradation half-life in tomatoes;  $t_{1/2, \text{soil}}$ , degradation half-life in soil), substance mass applied in model and experiment, treat plant component, application rate and formulation

| Substance                                        | famoxadone                                                                     | oxathiapiprolin                                                                                                                                                              |
|--------------------------------------------------|--------------------------------------------------------------------------------|------------------------------------------------------------------------------------------------------------------------------------------------------------------------------|
| IUPAC name                                       | ( <i>RS</i> )-3-anilino-5-methyl-5-(4-phenoxyphenyl)-1,3-oxazolidine-2,4-dione | 1-(4-(4-(( <i>5RS</i> )-5-(2,6-difluorophenyl)-4,5-dihydro-1,2-oxazol-3-yl)-1,3-thiazol-2-yl)-1-piperidyl)-2-(5-methyl-3-(trifluoromethyl)-1 <i>H</i> -pyrazol-1-yl)ethanone |
| CAS-RN                                           | 131807-57-3                                                                    | 1003318-67-9                                                                                                                                                                 |
| MW(g mol <sup>-1</sup> )                         | 374.4                                                                          | 539.52                                                                                                                                                                       |
| Log kow                                          | 4.65                                                                           | 3.66                                                                                                                                                                         |
| Log kaw                                          | -2.34                                                                          | -2.45                                                                                                                                                                        |
| $t_{1/2}$ tomatoes (d)                           | 3.2/5..2                                                                       | 2.4/3.0                                                                                                                                                                      |
| $t_{1/2}$ soil (d)                               | 8.3/6.0                                                                        | 11.7/1.2                                                                                                                                                                     |
| $m_{\text{applied in model}}$<br>(g.a.i/ha)      | 165                                                                            |                                                                                                                                                                              |
| $m_{\text{applied in experiment}}$<br>(g.a.i/ha) | 165                                                                            |                                                                                                                                                                              |
| Treat plant component(s)                         | Foliar application                                                             |                                                                                                                                                                              |
| Application rate<br>(kg/m <sup>2</sup> /d)       | 0                                                                              |                                                                                                                                                                              |
| Formulation (%)                                  | 90.9                                                                           | 9.1                                                                                                                                                                          |

**Table S3.** Different models to fit residual pesticide concentration curves and estimate corresponding determination coefficient ( $R^2$ ) for famoxadone and oxathiapiprolin in tomatoes.

| models                                | famoxadone                                       |         |                                                  |         | oxathiapiprolin                                |         |                                                  |         |
|---------------------------------------|--------------------------------------------------|---------|--------------------------------------------------|---------|------------------------------------------------|---------|--------------------------------------------------|---------|
|                                       | 2015                                             |         | 2016                                             |         | 2015                                           |         | 2016                                             |         |
|                                       | Residual concentration curve                     | $R^2$   | Residual concentration curve                     | $R^2$   | Residual concentration curve                   | $R^2$   | Residual concentration curve                     | $R^2$   |
| Zero-order                            | $C(t) = 0.1520 - 0.0084t$                        | 0.56975 | $C(t) = 0.1518 - 0.0068t$                        | 0.80569 | $C(t) = 0.01834 - 0.00112t$                    | 0.53129 | $C(t) = 0.0134 - 6.856E - 4t$                    | 0.72331 |
| Half-order                            | $C(t) = (-0.4457 + 0.0307t)^2$                   | 0.91598 | $C(t) = (-0.4012 + 0.0132t)^2$                   | 0.86499 | $C(t) = (-0.1547 + 0.0108t)^2$                 | 0.8664  | $C(t) = (-0.1239 + 0.0062t)^2$                   | 0.87251 |
| First-order                           | $C(t) = 0.2135e^{-0.2049t}$                      | 0.91705 | $C(t) = 0.1686e^{-0.0951t}$                      | 0.90035 | $C(t) = 0.0290e^{-0.2905t}$                    | 0.96564 | $C(t) = 0.01626e^{-0.1464t}$                     | 0.89542 |
| One-and-a-half-order                  | $C(t) = \frac{1}{(2.1442 + 0.2883t)^2}$          | 0.90494 | $C(t) = \frac{1}{(2.3843 + 0.1635t)^2}$          | 0.93468 | $C(t) = \frac{1}{(5.8191 + 1.1355t)^2}$        | 0.95041 | $C(t) = \frac{1}{(7.6404 + 0.8643t)^2}$          | 0.90494 |
| Second-order                          | $C(t) = \frac{0.2138}{1 + 0.3513t}$              | 0.86856 | $C(t) = \frac{0.1820}{1 + 0.1939t}$              | 0.94119 | $C(t) = \frac{0.0296}{1 + 0.5240t}$            | 0.90981 | $C(t) = \frac{0.01782}{1 + 0.3320t}$             | 0.93295 |
| Root function<br>first-order          | $C(t) = 0.2290e^{-0.4646\sqrt{t}}$               | 0.79168 | $C(t) = 0.1930e^{-0.3313\sqrt{t}}$               | 0.89447 | $C(t) = 0.0306e^{-0.5751\sqrt{t}}$             | 0.85045 | $C(t) = 0.0186e^{-0.4348\sqrt{t}}$               | 0.91338 |
| Root function<br>one-and-a-half-order | $C(t) = \frac{1}{(2.1025 + 0.6212\sqrt{t})^2}$   | 0.72143 | $C(t) = \frac{1}{(2.2686 + 0.4738\sqrt{t})^2}$   | 0.87487 | $C(t) = \frac{1}{(5.7614 + 2.1998\sqrt{t})^2}$ | 0.77584 | $C(t) = \frac{1}{(7.3016 + 2.0990\sqrt{t})^2}$   | 0.86755 |
| Root function<br>second-order         | $C(t) = \frac{0.2210}{1 + 0.7431\sqrt{t}}$       | 0.6534  | $C(t) = \frac{0.1934}{1 + 0.5151\sqrt{t}}$       | 0.79833 | $C(t) = \frac{0.0294}{1 + 1.0153\sqrt{t}}$     | 0.70423 | $C(t) = \frac{0.0187}{1 + 0.7469\sqrt{t}}$       | 0.81375 |
| Combined<br>first+first-order         | $C(t) = 0.0055e^{-0.4385t} + 0.0174e^{-0.0544t}$ | 0.9140  | $C(t) = 0.0598e^{-0.0403t} + 0.0602e^{-0.9787t}$ | 0.8998  | --                                             | --      | $C(t) = 0.0058e^{-0.0560t} + 0.0006e^{-1.3866t}$ | 0.9043  |

Note: "--" represents that the residual concentration curve could not be estimated by corresponding model

**Table S4.** HPLC-MS/MS parameters of famoxadone, oxathiapirolin, IN-E8S72 and IN-WR791

| Compounds      | $t_R$ (min) | HPLC-MS/MS     |                |                |                |            |
|----------------|-------------|----------------|----------------|----------------|----------------|------------|
|                |             | Quantification | Collision      | Confirmatory   | Collision      | Fragmentor |
|                |             | ion transition | energy<br>(eV) | ion transition | energy<br>(eV) | (eV)       |
| famoxadone     |             | 392.2-238.2    | 10             | 392.2-195      | 25             | 90         |
|                |             |                |                | 392.2-93.2     | 40             |            |
| oxathiapirolin |             | 540.1-500.1    | 25             | 540.1-350.1    | 30             | 140        |
|                |             |                |                | 540.1-167.1    | 25             |            |
| IN-E8S72       |             | 179-135.1      | 5              | 179-65.1       | 15             | 60         |
| IN-WR791       |             | 207.1-143.1    | 10             | 207.1-163.1    | 5              | 70         |
|                |             |                |                | 207.1-123.1    | 15             |            |

**Table S5.** The calibration curves, coefficient of determination ( $R^2$ ) and LOD/LOQs of famoxadone, oxathiapiprolin, IN-E8S72 and IN-WR791 in tomatoes and soil

| Matrix   | Compound        | Calibration curve          | $R^2$  | LOD<br>(mg/kg)       | LOQ<br>(mg/kg) |
|----------|-----------------|----------------------------|--------|----------------------|----------------|
| tomatoes | famoxadone      | $y = 12,578.94 x + 3.57$   | 1.00   | $4.2 \times 10^{-5}$ | 0.01           |
|          | oxathiapiprolin | $y = 78907x - 973.86$      | 0.9984 | $1.5 \times 10^{-5}$ | 0.02           |
|          | IN-E8S72        | $y = 47,070.05 x - 369.76$ | 0.9984 | $3.8 \times 10^{-4}$ | 0.02           |
|          | IN-WR791        | $y = 103279x - 1426.3$     | 0.9989 | $2.2 \times 10^{-4}$ | 0.02           |
| soil     | famoxadone      | $y = 27306x + 810.2$       | 0.9985 | $8.6 \times 10^{-5}$ | 0.01           |
|          | oxathiapiprolin | $y = 94508x + 97.356$      | 1.00   | $1.8 \times 10^{-5}$ | 0.02           |
|          | IN-E8S72        | $y = 27306x + 810.2$       | 0.9985 | $2.2 \times 10^{-4}$ | 0.02           |
|          | IN-WR791        | $y = 35239x - 49.903$      | 0.9999 | $2.1 \times 10^{-4}$ | 0.02           |

**Table S6.** Recoveries (n=5) and RSD of famoxadone, oxathiapiprolin, IN-E8S72 and IN-WR791 in tomatoes and soil

| Matrix   | Compound        | Fortified level<br>(mg/kg) | Average<br>recovery (%) | RSD<br>(%) |
|----------|-----------------|----------------------------|-------------------------|------------|
| tomatoes | famoxadone      | 0.01                       | 99.3±3.6                | 3.1        |
|          |                 | 0.02                       | 105.7±5.5               | 4.7        |
|          |                 | 0.1                        | 97.7±2.4                | 2.1        |
|          | oxathiapiprolin | 0.02                       | 100.4±2.4               | 2.1        |
|          |                 | 0.2                        | 108.4±4.3               | 4.4        |
|          |                 | 0.5                        | 100.2±2.6               | 2.3        |
|          | IN-E8S72        | 0.02                       | 101.5±1.5               | 1.9        |
|          |                 | 0.2                        | 101.5±1.5               | 5.0        |
|          |                 | 0.5                        | 104.3±2.3               | 3.1        |
|          | IN-WR791        | 0.02                       | 80.6±3.4                | 3.6        |
|          |                 | 0.2                        | 103.3±2.6               | 3.1        |
|          |                 | 0.5                        | 99.0±3.2                | 3.2        |
| soil     | famoxadone      | 0.01                       | 87.0±1.2                | 1.4        |
|          |                 | 0.02                       | 86.0±1.7                | 1.9        |
|          |                 | 0.1                        | 95.0±2.9                | 3.1        |
|          | oxathiapiprolin | 0.02                       | 93.0±2.2                | 2.3        |
|          |                 | 0.2                        | 86.7±1.2                | 1.4        |
|          |                 | 0.5                        | 93.3±3.2                | 3.5        |
|          | IN-E8S72        | 0.02                       | 97.6±2.8                | 2.8        |
|          |                 | 0.2                        | 79.8±2.8                | 3.5        |
|          |                 | 0.5                        | 80.2±3.8                | 4.8        |
|          | IN-WR791        | 0.02                       | 88.4±2.6                | 2.9        |
|          |                 | 0.2                        | 88.1±2.9                | 3.3        |
|          |                 | 0.5                        | 81.0±2.8                | 3.5        |

**Table S7.** Different models to fit residual pesticide concentration curves and estimate corresponding determination coefficient ( $R^2$ ) for famoxadone and oxathiapiprolin in soil.

| models                                | famoxadone                                     |        |                                                |        | oxathiapiprolin                                  |        |                                                  |        |
|---------------------------------------|------------------------------------------------|--------|------------------------------------------------|--------|--------------------------------------------------|--------|--------------------------------------------------|--------|
|                                       | 2015                                           |        | 2016                                           |        | 2015                                             |        | 2016                                             |        |
|                                       | Residual concentration curve                   | $R^2$  | Residual concentration curve                   | $R^2$  | Residual concentration curve                     | $R^2$  | Residual concentration curve                     | $R^2$  |
| Zero-order                            | $C(t) = 0.0759 - 0.0016t$                      | 0.9096 | $C(t) = 0.0843 - 0.0022t$                      | 0.6042 | $C(t) = 0.0634 - 1.3570 \text{ E} - 4t$          | 0.6136 | $C(t) = 0.0108 - 2.949\text{E} - 4t$             | 0.5691 |
| Half-order                            | $C(t) = (-0.3240 + 0.0057t)^2$                 | 0.9646 | $C(t) = (-0.3129 + 0.0013t)^2$                 | 0.8782 | $C(t) = (-0.0859 + 0.0017t)^2$                   | 0.7920 | $C(t) = (-0.1080 + 0.0019t)^2$                   | 0.6197 |
| First-order                           | $C(t) = 0.1910e^{-0.0833t}$                    | 0.9796 | $C(t) = 0.1071e^{-0.1147t}$                    | 0.9096 | $C(t) = 0.0077e^{-0.0501t}$                      | 0.8730 | $C(t) = 0.0132e^{-0.0499t}$                      | 0.6877 |
| One-and-a-half-order                  | $C(t) = \frac{1}{(1.5001 + 0.2766t)^2}$        | 0.7184 | $C(t) = \frac{1}{(3.0241 + 0.2267t)^2}$        | 0.8944 | $C(t) = \frac{1}{(11.2010 + 0.3656t)^2}$         | 0.9108 | $C(t) = \frac{1}{(8.0576 + 0.3196t)^2}$          | 0.7763 |
| Second-order                          | $C(t) = \frac{0.0174}{1 + 0.0449t}$            | 0.4481 | $C(t) = \frac{0.1109}{1 + 0.1930t}$            | 0.8635 | $C(t) = \frac{0.0082}{1 + 0.08511t}$             | 0.9242 | $C(t) = \frac{0.0190}{1 + 0.1500t}$              | 0.8709 |
| Root function<br>first-order          | $C(t) = 0.7120e^{-0.7444\sqrt{t}}$             | 0.8309 | $C(t) = 0.1190e^{-0.3370\sqrt{t}}$             | 0.7956 | --                                               | --     | --                                               | --     |
| Root function<br>one-and-a-half-order | $C(t) = \frac{1}{(0.6562 + 0.2695\sqrt{t})^2}$ | 0.3524 | $C(t) = \frac{1}{(2.9034 + 0.6052\sqrt{t})^2}$ | 0.7249 | $C(t) = \frac{1}{(9.6347 + 1.7708\sqrt{t})^2}$   | 0.9148 | $C(t) = \frac{1}{(5.4654 + 2.0296\sqrt{t})^2}$   | 0.9040 |
| Root function<br>second-order         | $C(t) = \frac{0.5836}{1 + 29.0220\sqrt{t}}$    | 0.0466 | $C(t) = \frac{0.1171}{1 + 4.3091\sqrt{t}}$     | 0.6546 | $C(t) = \frac{0.0016}{1 + 5.8023\sqrt{t}}$       | 0.9015 | $C(t) = \frac{0.0221}{1 + 2.8118\sqrt{t}}$       | 0.7986 |
| Combined<br>first+first-order         | --                                             | --     | --                                             | --     | $C(t) = 0.0035e^{-0.0357t} + 0.0032e^{-0.0741t}$ | 0.9153 | $C(t) = 0.0118e^{-0.6517t} + 0.0059e^{-0.2771t}$ | 0.9030 |

Note: "--" represents that the residual concentration curve could not be estimated by corresponding model

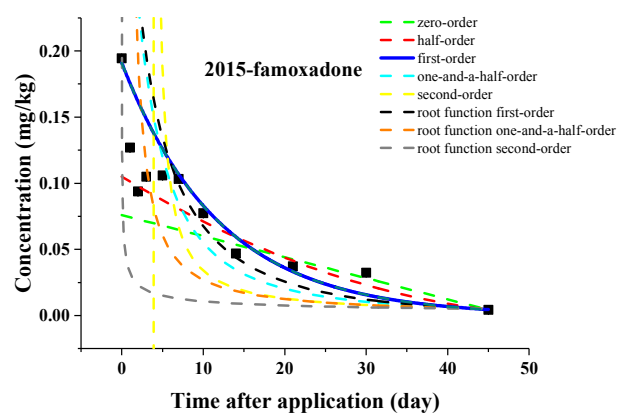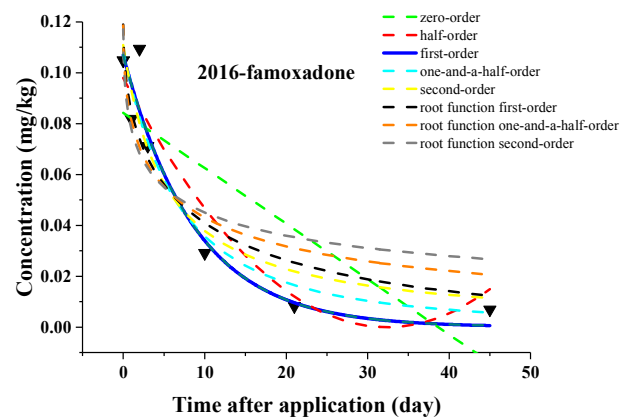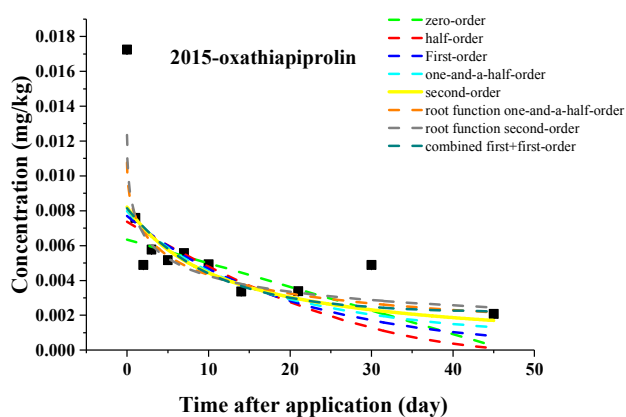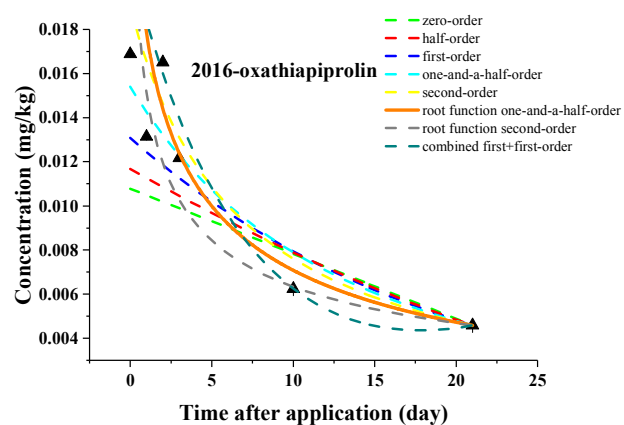

**Figure S1.** Different dissipation kinetic models for famoxadone and oxathiapiprolin during the years of 2015 and 2016 in soil samples in Beijing, respectively (The most suitable model was expressed with solid line and others dotted lines)
